# Supplementary material for: Effect of statin treatment on circulating malondialdehyde concentrations: a systematic review and meta-analysis
Source: PubMed Central journal article supplement — Ther Adv Chronic Dis. 2019 Jul 18;10:2040622319862714. doi: 10.1177/2040622319862714 (PMC6643183; doi:10.1177/2040622319862714), 2019-07-18
Supplement: Supplementary_file_1.pdf [file Supplementary_file_1.pdf]

## Full electronic search strategy – PubMed database

1. “Malondialdehyde”
2. “MDA”
3. “Statin”
4. “Simvastatin”
5. “Pravastatin”
6. “Atorvastatin”
7. “Fluvastatin”
8. “Rosuvastatin”
9. 1 AND 3
10. 1 AND 4
11. 1 AND 5
12. 1 AND 6
13. 1 AND 7
14. 1 AND 8
15. 2 AND 3
16. 2 AND 4
17. 2 AND 5
18. 2 AND 6
19. 2 AND 7
20. 2 AND 8
21. 1 OR 2
22. 21 AND 3
23. 21 AND 4
24. 21 AND 5
25. 21 AND 6
26. 21 AND 7
27. 21 AND 8
28. 4 OR 5 OR 6 OR 7 OR 8
29. 1 AND 28
30. 2 AND 28
31. 21 AND 28
